# Supplementary material for: The association between atopic eczema and lymphopenia: Results from a UK cohort study with replication in US survey data
Source: PubMed Central journal article supplement (PMC10947025; doi:10.1111/jdv.18841), 2023-01-25

**Supplementary Figure 1a: Diagram of the method of analysis – Logistic Regression**

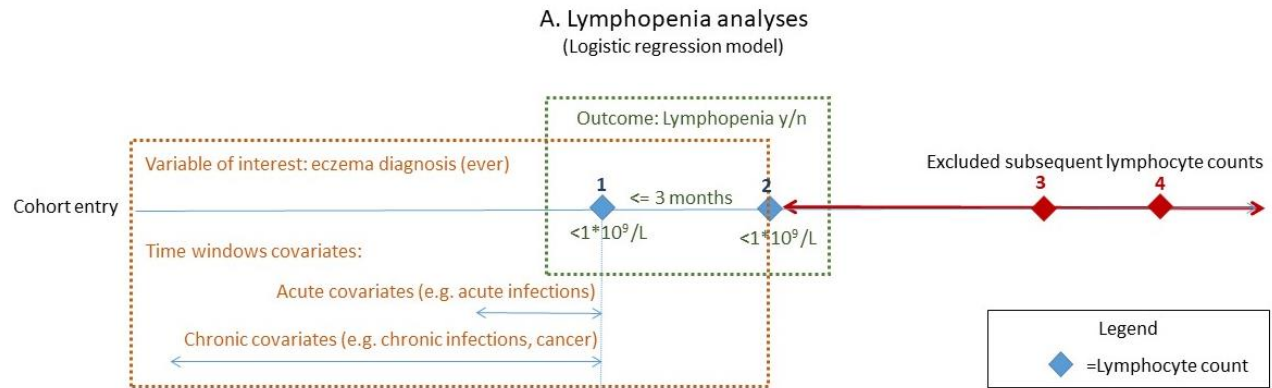

**Supplementary Figure 1b: Diagram of the method of analysis – Linear Mixed Model**

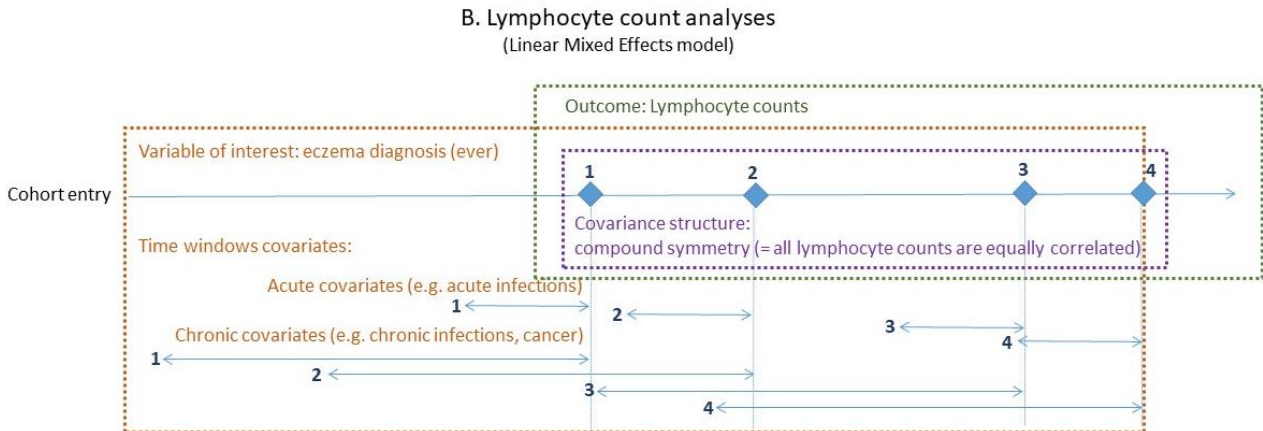

Supplement: JDV-37-1190-s008.pdf [file JDV-37-1190-s008.pdf]
